# Supplementary material
Source: PubMed Central journal article supplement (PMC2905305)
Supplement: supp_213_15_2673__2.pdf [file supp_213_15_2673__2.pdf]

Table S1. Probabilities from pairwise comparisons of least square means from a significant 2-way ANCOVA ( $F_{1,51}=4.4$ ;  $P=0.04$ ) for final body mass (day 558) between all subgroups ( $\alpha=0.025$ )

|                 | Sham Sedentary | Sham Run | Sham Swim | S-LAo Sedentary | S-LAo Run | S-LAo Swim |
|-----------------|----------------|----------|-----------|-----------------|-----------|------------|
| Sham Sedentary  | X              |          |           |                 |           |            |
| Sham Run        | 0.017          | X        |           |                 |           |            |
| Sham Swim       | 0.029          | 0.792    | X         |                 |           |            |
| S-LAo Sedentary | 0.057          | 0.746    | 0.929     | X               |           |            |
| S-LAo Run       | <0.001         | 0.218    | 0.137     | 0.151           | X         |            |
| S-LAo Swim      | 0.016          | 0.808    | 0.633     | 0.595           | 0.368     | X          |

The Sham Sedentary group had a significantly larger final body mass ( $P\leq 0.017$ ) compared with the Sham Run, S-LAo Run and S-LAo Swim groups but not compared with the S-LAo Sedentary or Sham Swim groups.

S-LAo, successful experimental animals with an occluded LAo upstream and downstream of the foramen of Panizza.

Table S2. Probabilities from pairwise comparisons of least square means from non-significant 2-way ANCOVA ( $F_{1,51}=3.0$ ;  $P=0.09$ ) for final snout-to-vent length (day 558) between all subgroups ( $\alpha=0.025$ )

|                 | Sham Sedentary | Sham Run | Sham Swim | S-LAo Sedentary | S-LAo Run | S-LAo Swim |
|-----------------|----------------|----------|-----------|-----------------|-----------|------------|
| Sham Sedentary  | X              |          |           |                 |           |            |
| Sham Run        | <0.01          | X        |           |                 |           |            |
| Sham Swim       | <0.01          | 0.633    | X         |                 |           |            |
| S-LAo Sedentary | 0.031          | 0.485    | 0.784     | X               |           |            |
| S-LAo Run       | <0.001         | 0.350    | 0.167     | 0.133           | X         |            |
| S-LAo Swim      | 0.024          | 0.572    | 0.883     | 0.91            | 0.168     | X          |

The Sham Sedentary group had a significantly larger final SVL ( $P\leq 0.024$ ) compared with the four exercised groups, but not compared with the S-LAo Sedentary group.

Table S3. Probabilities from pairwise comparisons of least square means from non-significant 2-way ANCOVA ( $F_{1,51}=1.5$ ;  $P=0.23$ ) for final head length (day 558) between all subgroups ( $\alpha=0.025$ )

|                 | Sham Sedentary | Sham Run | Sham Swim | S-LAo Sedentary | S-LAo Run | S-LAo Swim |
|-----------------|----------------|----------|-----------|-----------------|-----------|------------|
| Sham Sedentary  | X              |          |           |                 |           |            |
| Sham Run        | 0.011          | X        |           |                 |           |            |
| Sham Swim       | 0.036          | 0.596    | X         |                 |           |            |
| S-LAo Sedentary | 0.081          | 0.530    | 0.877     | X               |           |            |
| S-LAo Run       | <0.01          | 0.837    | 0.253     | 0.236           | X         |            |
| S-LAo Swim      | 0.124          | 0.407    | 0.714     | 0.847           | 0.175     | X          |

The Sham Sedentary group had a significantly larger final head length than only the Sham Run and S-LAo Run groups ( $P\leq 0.011$ ).
