# Supplementary material
Source: PubMed Central journal article supplement (PMC2905305)

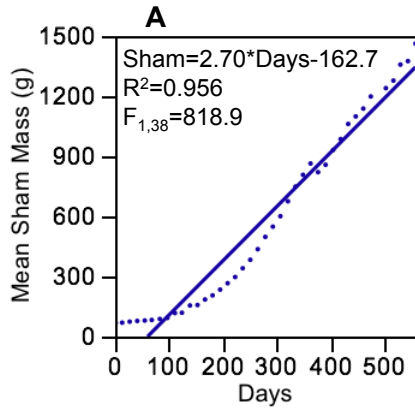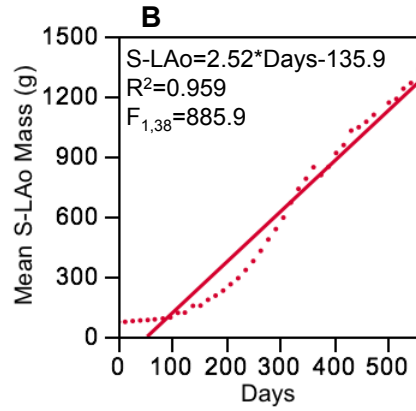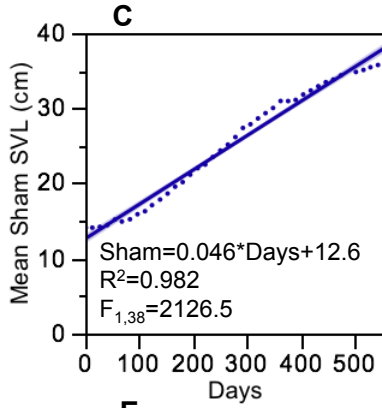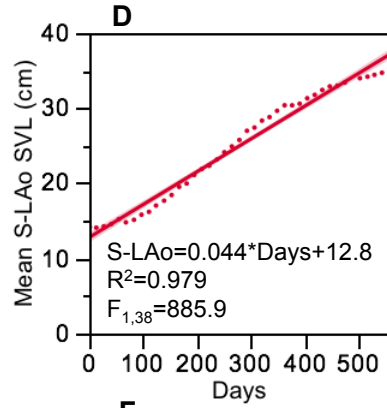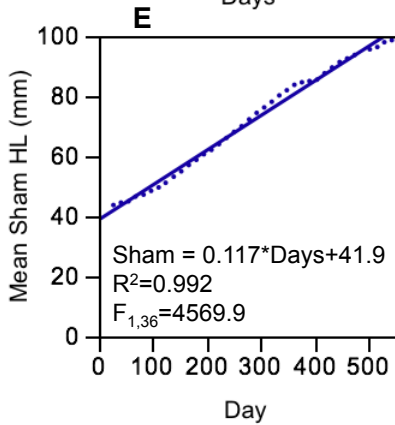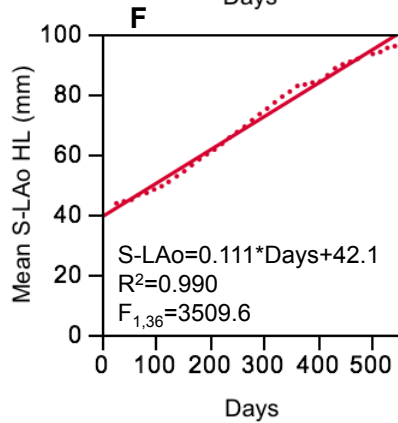

Supplement: supp_213_15_2673__1.pdf [file supp_213_15_2673__1.pdf]
